# Supplementary material
Source: publisher figshare collection journal article supplement (https://tandf.figshare.com/ndownloader/files/21748836)
Supplement: Supplementary file 1 [file 21748836]

Supplementary Table 1.

**Gene Bank accession numbers of selected Begomovirus (DNA-A) sequences used in this study for analysis**

| **Begomovirus species** | **Accession No** | **Abbreviation** |
| --- | --- | --- |
| Papaya leaf curl virus - Croton[India:Bang:Cr2:Croton:2007] | JN831446 | PaLCuV-Cro[IN:Ban:Cr2:Cro:07] |
| Papaya leaf curl virus - Croton[India:Croton] | AJ507777 | PaLCuV-Cro[IN:Cro] |
| Papaya leaf curl virus - India [India:Haryana:Acalypha3:2007] | FN645902 | PaLCuV-IN[IN:Har:Aca3:07] |
| Papaya leaf curl virus - India [India: Bhubaneswar:Chilli:2009] | JN663850 | PaLCuV-IN[IN:Bhu:Chi:09] |
| Tomato leaf curl Pune virus - [India:Pune:2005] | AY754814 | ToLCPuV-[IN:Pun:05] |
| Tomato leaf curl Rajasthan virus - [India:Rajasthan:2005] | DQ339117 | ToLCRaV-[IN:Raj:05] |
| Tomato leaf curl Bangalore virus - C [India:Bangalore 4:1997] | AF165098 | ToLCBaV-C[IN:Ban4:97] |
| Tomato leaf curl Kerala virus - [India:Kerala 3:2007] | EU910141 | ToLCKeV-[IN:Ker3:07] |
| Tomato leaf curl Patna virus - [India:Patna:2008] | EU862323 | ToLCPatV-[IN:Pat:08] |
| Tomato leaf curl New Delhi virus - [India:New Delhi:Severe:1992] | U15015 | ToLCNDV-[IN:ND:Svr:92] |
| Tomato leaf curl Palampur virus - [India:Palampur:2007] | AM884015 | ToLCPalV-[IN:Pal:047] |
| Tomato leaf curl Bangladesh virus - [Bangladesh:BD2] | AF188481 | ToLCBV-[BD:BD2] |
| Papaya leaf curl virus - Tobacco[India:Lucknow:Nicotiana glutinosa:2010] | HM143914 | PaLCuV-Tob[IN:Luc:Nic:10] |
| Ageratum enation virus - India [India:Pantnagar:TC357:2012] | JX436472 | AEV-IN[IN:Pan:TC357:12] |
| Tobacco curly shoot virus - [India:Agartala:2010] | JN387045 | TbCSV-[IN:Aga:10] |
| Chilli leaf curl virus - [India:Phaseolus aureus:HJP3:2011] | JQ654460 | ChiLCV-[IN:Pau:HJP3:11] |
| Radish leaf curl virus - Tomato [Pakistan:Bihar:Tomato:2009] | GU732204 | RaLCuV-To[PK:Bih:To:09] |
| Cotton leaf curl Kokhran virus - Burewala [India:Bihar:Tomato:2009] | HM461862 | CLCuKoV-Bu[IN:Bih:Tom:09] |
| Cotton leaf curl Bangalore virus - [India:Bangalore:2004] | AY705380 | CLCuBaV-[IN:Ban:04] |
| Cotton leaf curl Alabad virus - Alabad [Pakistan:Alabad 804a:1996] | AJ002452 | CLCuAlV-Al[PK:Ala804a:96] |
| Cotton leaf curl Multan virus - Rajasthan [India:Sri-Ganganagar:2008] | GQ220850 | CLCuMuV-IN[IN:SG:08] |
| Okra enation leaf curl virus - [India:Munthal EL41:2006] | GU111999 | OELCuV-[IN:MunEL41:06] |
| Bhendi yellow vein mosaic virus - India [India:Madurai] | AF241479 | BYVMV-IN[IN:Mad] |
| French bean leaf curl virus - [India:Kanpur:2011] | JQ866297 | FbLCV-[IN:Kan:11] |
| Mungbean yellow mosaic India virus - [India:New Delhi:Cowpea 7:1998] | AF481865 | MYMIV-[IN:ND:Cp7:98] |
| Pedilanthus leaf curl virus - Soybean [Pakistan:Nawab Shah:Soybean:2009] | AM948961 | PeLCV-Sb[PK:NS:Sb:09] |

Supplementary table 2

Gene Bank accession numbers of selected Betasatellites sequences used in this study for analysis

| **Betasatellites** | **Accession No.** | **Abbreviation** |
| --- | --- | --- |
| Papaya leaf curl betasatellite | KY825247 | PaLCuB- Chilli |
| Papaya leaf curl betasatellite | KY825246 | PaLCuB- Chilli |
| Papaya leaf curl betasatellite | KY825245 | PaLCuB- Chilli |
| Papaya leaf curl betasatellite | JN663874 | PaLCuB-Chilli |
| Papaya leaf curl betasatellite | KT253636 | PaLCuB- Cluster bean |
| Papaya leaf curl betasatellite | MH359169 | PaLCuB- wild sunflower |
| Ageratum yellow vein betasatellite[India:Madurai: *Ageratum conyzoides*:03] | AJ557441 | AEVB-[IN:Mad:Age:03] |
| Croton yellow vein mosaic betasatellite [India:Bhubaneswar:OYBHU:2006] | GU111995 | CroYVMB-[IN:bhu:Ok:06] |
| Croton yellow vein mosaic betasatellite[India: Cr2:2007] | JN831447 | CroYVMB-[IN:Bang-Cr2:07] |
| Croton yellow vein mosaic betasatellite[India: Cr1:2007] | JN831447 | CroYVMB-[IN:Bang-Cr1:07] |
| Croton yellow vein mosaic betasatellite[India:Bihar:Corotn:2001] | KF964661 | CroYVMB-[IN:Bih:Cro:01] |
| Radish leaf curl betasatellite[India:Chilli:08] | JN663873 | RaLCuB-[IN:Chi:08] |
| Tomato leaf curl betasatellite[India:Rajastahn:Tomato:2015] | KU500806 | ToLCB-[IN:Raj:Tom:15] |
| Tomato leaf curl betasatellite-[India:Junagad:TC306:2011] | KJ605115 | ToLCB-[IN:Jun:Tom:11] |
| Cotton leaf curl Multan betasatellite[India: Raigunj:Hibiscus:08] | FJ159274 | CLCuMuB-[IN:Rai:Hib:08] |
| Tobacco curly shoot betasatellite [China:Yunnan 2:1999] | AJ421485 | TbCSB-[CN:Yn2:99] |
| Tomato leaf curl Joydebpur betasatellite[India:Nagpur:Chilli:09] | JN663863 | ToLCJoB-[IN:Nag:Chi:09] |
| Tomato leaf curl Bangladesh betasatellite [India:Rajasthan:2003] | AY438558 | ToLCBDB-[IN:Raj:03] |
| Chilli leaf curl betasatellite [Pakistan:Nowshera44:2004] | AM279668 | ChLCB-[PK:Now44:04] |
| Tomato leaf curl Patna betasatellite[India:Bihar:Tobacco:2009] | HQ180393 | ToLCPnB-[IN:Bih:Tob:09] |
